# Supplementary material
Source: PubMed Central journal article supplement (PMC2234123)
Supplement: pnas_0711043105_1.pdf [file pnas_0711043105_1.pdf]

## SI Appendix 1

**Table 1.** Number of singleton genes and duplicate genes in the different degree-defined bins

| Degree ( k ) | 1   | 2   | 3   | 4   | 5   | 6   | 7  |
|--------------|-----|-----|-----|-----|-----|-----|----|
| singletons   | 329 | 257 | 234 | 171 | 149 | 106 | 84 |
| duplicates   | 189 | 199 | 138 | 102 | 77  | 67  | 65 |

| Degree ( k ) | 8      | 9      | 10 | 11 | 12 | 13 | 14 | 15 | >15 |
|--------------|--------|--------|----|----|----|----|----|----|-----|
| singletons   | 7<br>5 | 6<br>6 | 72 | 64 | 56 | 49 | 36 | 34 | 439 |
| duplicates   | 4<br>2 | 4<br>4 | 35 | 28 | 24 | 29 | 23 | 19 | 347 |

**Table 2.** Regression analysis – phenotypes vs. degree (connectivity) in duplicates and singletons

|            | Logistic Regression*                                        |         |           | Linear Regression* $P(k) = \alpha + \beta k$ |         |                  |       |
|------------|-------------------------------------------------------------|---------|-----------|----------------------------------------------|---------|------------------|-------|
|            | $\log\left(\frac{P(k)}{1 - P(k)}\right) = \alpha + \beta k$ |         |           | $\alpha$                                     | $\beta$ | Error in $\beta$ | $r^2$ |
| Singletons | 1.4933                                                      | -0.17   | 3.39e-098 | 0.8244                                       | -0.036  | 0.005            | 0.91  |
| Duplicates | 2.6557                                                      | -0.1436 | 5.0e-5    | 0.9438                                       | -0.019  | 0.006            | 0.67  |

\* k – the degree (connectivity), P – the proportion of viable phenotypes with degree k.

---

**Table 3.** Dependencies of gene-deletion phenotypes on both the degree and paralogy\* of the deleted gene (two-way ANOVA)

| Source of phenotype*<br>variability | Sum<br>Sq. | d.f. | Mean<br>Sq. | F      | Prob>F |
|-------------------------------------|------------|------|-------------|--------|--------|
| Degree (X1)                         | 12.617     | 15   | 0.8411      | 7.88   | 0      |
| Paralogy** (X2)                     | 13.373     | 1    | 13.3725     | 125.26 | 0      |
| Interaction (X1×X2)                 | 3.807      | 15   | 0.2538      | 2.38   | 0.0021 |
| Error                               | 312.91     | 2931 | 0.1068      |        |        |
| Total                               | 347.459    | 2962 |             |        |        |

\* Phenotypes were defined as Ph=1 if mutant was viable and Ph=0 otherwise.

\*\* Paralogy was defined as X1=1 if a gene has a paralogous partner and X1=0 otherwise.

**Table 4.** Dependencies of gene-deletion phenotypes of duplicate genes on both degree and age of duplication (two-way ANOVA)

\* Phenotypes were defined as Ph=1 if mutant was viable and Ph=0 otherwise.

| Source of phenotype*<br>variability | Sum<br>Sq. | d.f. | Mean<br>Sq. | F     | Prob>F |
|-------------------------------------|------------|------|-------------|-------|--------|
| Degree (X1)                         | 3.475      | 3    | 1.15845     | 13.96 | 0      |
| Duplication age** (X2)              | 0.619      | 1    | 0.61939     | 7.46  | 0.0064 |
| Interaction (X1×X2)                 | 0.576      | 3    | 0.19206     | 2.31  | 0.0743 |
| Error                               | 116.216    | 1400 | 0.08301     |       |        |
| Total                               | 133.232    | 1407 |             |       |        |

\*\* Age was roughly defined as X2=0 for “early duplications” ( $K_s > 1$ ) and X2=1 for “late duplications” ( $K_s < 1$ ).

**Table 5.** Dependencies of gene-deletion phenotypes of duplicate genes on both degree and expression similarity (two-way ANOVA)

| Source of phenotype*<br>variability | Sum<br>Sq. | d.f. | Mean<br>Sq. | F     | Prob>F |
|-------------------------------------|------------|------|-------------|-------|--------|
| Degree (X1)                         | 12.84      | 3    | 4.27996     | 51.55 | 0      |
| m. exp. sim** (X2)                  | 0.218      | 1    | 0.21792     | 2.62  | 0.1054 |

| Source of phenotype*<br>variability | Sum<br>Sq. | d.f. | Mean<br>Sq. | F    | Prob>F |
|-------------------------------------|------------|------|-------------|------|--------|
| Interaction (X1×X2)                 | 1.042      | 3    | 0.34727     | 4.18 | 0.0059 |
| Error                               | 116.242    | 1400 | 0.08303     |      |        |
| Total                               | 133.232    | 1407 |             |      |        |

\* Phenotypes were defined as  $Ph=1$  if mutant was viable and  $Ph=0$  otherwise.

\*\* Expression similarity was roughly defined as  $X2=1$  if the mean expression similarity (Kafri, Bar-Even et al. 2005) of duplicates was greater than 0.3 and  $X2=0$  otherwise.

**Table 6.** Dependencies of gene-deletion phenotypes of duplicate genes on degree, expression similarity and age of duplication (three-way ANOVA)

1. Phenotypes were defined as  $Ph=1$  if mutant was viable and  $Ph=0$  otherwise.

| Source of phenotype <sup>1</sup><br>variability | Sum<br>Sq. | d.f. | Mean<br>Sq. | F      | Prob>F |
|-------------------------------------------------|------------|------|-------------|--------|--------|
| Degree <sup>2</sup> (X1)                        | 9.391      | 1    | 9.39141     | 107.72 | 0      |
| m. exp. Sim <sup>3</sup> (X2)                   | 0.73       | 1    | 0.73038     | 8.38   | 0.0039 |
| Duplication age <sup>4</sup> (X3)               | 0.412      | 1    | 0.41234     | 4.73   | 0.0298 |
| Interaction<br>(X1×X2×X3)                       | 0.589      | 1    | 0.58907     | 6.76   | 0.0094 |
| Error                                           | 122.323    | 1403 | 0.08719     |        |        |
| Total                                           | 133.232    | 1407 |             |        |        |

2. Degree was roughly defined as  $X1=1$  if degree was greater than 5 and  $X1=0$  otherwise.

3. Expression similarity was roughly defined as  $X2=1$  if the mean expression similarity (Kafri, Bar-Even et al. 2005) of duplicates was greater than 0.3 and  $X2=0$  otherwise.

4. Age was roughly defined as  $X3=0$  for “early duplications” ( $Ks>1$ ) and  $X3=1$  for “late duplications” ( $Ks<1$ ).

## References

Kafri R, *et al.* (2005) Transcription control reprogramming in genetic backup circuits.  
*Nat Genet* 37(3): 295-9.
